# Supplementary material for: Patient Eligibility and Results for Brain Metastasis in Phase 3 Trials of Advanced Breast Cancer: A Scoping Review
Source: MDPI journal article supplement (doi:10.3390/cancers13215306), 2021-10-22
Supplement: s1 [file s1]

**Supplementary Table S1.** The list of analysed studies.

| No. | PMID     | Journal                 | Year | Tumour phenotype | Therapy | N arms | N patients | BM allowance |
|-----|----------|-------------------------|------|------------------|---------|--------|------------|--------------|
| 1.  | 9469328  | J Clin Oncol            | 1998 | 4                | 2       | 3      | 551        | 4            |
| 2.  | 9649142  | Br J Cancer             | 1998 | 9                | 1       | 2      | 259        | 5            |
| 3.  | 9652764  | Br J Cancer             | 1998 | 4                | 1       | 2      | 258        | 2            |
| 4.  | 9681078  | Ann Oncol               | 1998 | 4                | 2       | 3      | 555        | 4            |
| 5.  | 9850014  | J Clin Oncol            | 1998 | 4                | 1       | 2      | 303        | 4            |
| 6.  | 10091793 | Cancer                  | 1999 | 4                | 1       | 2      | 177        | 4            |
| 7.  | 10211086 | Eur J Cancer            | 1999 | 9                | 3       | 2      | 415        | 4            |
| 8.  | 10334524 | J Clin Oncol            | 1999 | 4                | 1       | 2      | 365        | 2            |
| 9.  | 10334526 | J Clin Oncol            | 1999 | 9                | 1       | 2      | 392        | 4            |
| 10. | 10458218 | J Clin Oncol            | 1999 | 1                | 2       | 2      | 452        | 4            |
| 11. | 10458219 | J Clin Oncol            | 1999 | 4                | 2       | 3      | 368        | 4            |
| 12. | 10550134 | J Clin Oncol            | 1999 | 9                | 1       | 2      | 563        | 2            |
| 13. | 10561296 | J Clin Oncol            | 1999 | 9                | 1       | 2      | 326        | 4            |
| 14. | 10561297 | J Clin Oncol            | 1999 | 4                | 1       | 2      | 209        | 2            |
| 15. | 10615229 | Eur J Cancer            | 1999 | 4                | 1       | 2      | 282        | 4            |
| 16. | 10637238 | J Clin Oncol            | 2000 | 1                | 3       | 2      | 231        | 5            |
| 17. | 10673513 | J Clin Oncol            | 2000 | 4                | 1       | 2      | 331        | 5            |
| 18. | 10674879 | Breast Cancer Res Treat | 1999 | 4                | 1       | 2      | 151        | 4            |
| 19. | 10735887 | J Clin Oncol            | 2000 | 1                | 2       | 2      | 769        | 4            |
| 20. | 10856098 | J Clin Oncol            | 2000 | 4                | 1       | 2      | 303        | 4            |
| 21. | 10942095 | Breast Cancer Res Treat | 2000 | 4                | 2       | 3      | 313        | 2            |
| 22. | 10963640 | J Clin Oncol            | 2000 | 9                | 1       | 3      | 417        | 5            |
| 23. | 11078487 | J Clin Oncol            | 2000 | 1                | 2       | 2      | 668        | 4            |
| 24. | 11078488 | J Clin Oncol            | 2000 | 1                | 2       | 2      | 353        | 4            |
| 25. | 11181656 | J Clin Oncol            | 2001 | 4                | 1       | 2      | 460        | 4            |
| 26. | 11230490 | J Clin Oncol            | 2001 | 4                | 1       | 2      | 297        | 4            |
| 27. | 11248153 | New Engl J Med          | 2001 | 2                | 4       | 2      | 469        | 2            |
| 28. | 11251000 | J Clin Oncol            | 2001 | 9                | 1       | 2      | 267        | 2            |
| 29. | 11261827 | Breast Cancer Res Treat | 2001 | 1                | 2       | 2      | 217        | 4            |
| 30. | 11304774 | J Clin Oncol            | 2001 | 4                | 1       | 2      | 151        | 2            |
| 31. | 11352951 | J Clin Oncol            | 2001 | 1                | 2       | 2      | 907        | 4            |
| 32. | 11378344 | Eur J Cancer            | 2001 | 9                | 1       | 2      | 280        | 4            |
| 33. | 11454883 | J Clin Oncol            | 2001 | 4                | 2       | 3      | 602        | 4            |
| 34. | 11815957 | Cancer                  | 2002 | 4                | 1       | 2      | 224        | 4            |
| 35. | 12065558 | J Clin Oncol            | 2002 | 4                | 1       | 2      | 511        | 4            |
| 36. | 12088118 | Breast Cancer Res Treat | 2002 | 1                | 2       | 2      | 1354       | 4            |
| 37. | 12118025 | J Clin Oncol            | 2002 | 4                | 1       | 2      | 275        | 2            |
| 38. | 12177098 | J Clin Oncol            | 2002 | 4                | 2       | 2      | 400        | 4            |
| 39. | 12177099 | J Clin Oncol            | 2002 | 1                | 2       | 2      | 451        | 4            |
| 40. | 12419743 | Ann Oncol               | 2002 | 4                | 1       | 1      | 260        | 4            |
| 41. | 12439707 | Br J Cancer             | 2002 | 9                | 1       | 2      | 176        | 4            |
| 42. | 12586793 | J Clin Oncol            | 2003 | 4                | 1       | 3      | 739        | 5            |
| 43. | 12637459 | J Clin Oncol            | 2003 | 9                | 1       | 2      | 429        | 4            |
| 44. | 12721259 | J Clin Oncol            | 2003 | 4                | 1       | 2      | 242        | 5            |
| 45. | 12796608 | Am J Clin Oncol         | 2003 | 1                | 2       | 2      | 238        | 4            |
| 46. | 12797397 | J Chemother             | 2003 | 4                | 1       | 3      | 131        | 4            |
| 47. | 14556923 | Eur J Cancer            | 2003 | 4                | 2       | 2      | 713        | 4            |
| 48. | 14722035 | J Clin Oncol            | 2004 | 4                | 2       | 2      | 305        | 4            |
| 49. | 14998846 | Ann Oncol               | 2004 | 4                | 1       | 2      | 509        | 2            |
| 50. | 15117982 | J Clin Oncol            | 2004 | 4                | 2       | 2      | 587        | 4            |
| 51. | 15169793 | J Clin Oncol            | 2004 | 9                | 1       | 3      | 474        | 2            |
| 52. | 15197192 | J Clin Oncol            | 2004 | 4                | 1       | 2      | 387        | 4            |

|      |          |                            |      |   |   |   |      |   |
|------|----------|----------------------------|------|---|---|---|------|---|
| 53.  | 15226326 | J Clin Oncol               | 2004 | 4 | 1 | 2 | 144  | 4 |
| 54.  | 15305399 | Cancer                     | 2004 | 4 | 1 | 2 | 202  | 4 |
| 55.  | 15367413 | Ann Oncol                  | 2004 | 4 | 1 | 2 | 327  | 2 |
| 56.  | 15367414 | Ann Oncol                  | 2004 | 4 | 1 | 2 | 160  | 4 |
| 57.  | 15459210 | J Clin Oncol               | 2004 | 4 | 1 | 2 | 301  | 5 |
| 58.  | 15570070 | J Clin Oncol               | 2004 | 4 | 7 | 2 | 189  | 5 |
| 59.  | 15681523 | J Clin Oncol               | 2005 | 4 | 5 | 2 | 462  | 4 |
| 60.  | 15726120 | Br J Cancer                | 2005 | 4 | 1 | 2 | 201  | 2 |
| 61.  | 15735116 | J Clin Oncol               | 2005 | 4 | 1 | 2 | 259  | 2 |
| 62.  | 15821120 | Ann Oncol                  | 2005 | 4 | 1 | 2 | 397  | 4 |
| 63.  | 16096436 | Anticancer Drugs           | 2005 | 4 | 1 | 2 | 364  | 5 |
| 64.  | 16110015 | J Clin Oncol               | 2005 | 4 | 1 | 2 | 449  | 5 |
| 65.  | 16172456 | J Clin Oncol               | 2005 | 9 | 1 | 2 | 454  | 4 |
| 66.  | 16192591 | J Clin Oncol               | 2005 | 4 | 1 | 2 | 216  | 4 |
| 67.  | 16293863 | J Clin Oncol               | 2005 | 9 | 1 | 2 | 705  | 4 |
| 68.  | 16633363 | Bone Marrow Transplant     | 2006 | 4 | 1 | 2 | 85   | 4 |
| 69.  | 16782917 | J Clin Oncol               | 2006 | 2 | 4 | 2 | 196  | 2 |
| 70.  | 16921042 | J Clin Oncol               | 2006 | 4 | 1 | 2 | 255  | 5 |
| 71.  | 17033039 | J Clin Oncol               | 2006 | 4 | 1 | 3 | 527  | 4 |
| 72.  | 17045796 | Eur J Cancer               | 2006 | 1 | 2 | 3 | 276  | 4 |
| 73.  | 17179098 | J Clin Oncol               | 2007 | 5 | 1 | 2 | 227  | 5 |
| 74.  | 17192538 | New Engl J Med             | 2006 | 2 | 4 | 2 | 324  | 2 |
| 75.  | 17329192 | Lancet Oncol               | 2007 | 4 | 1 | 2 | 252  | 4 |
| 76.  | 17414459 | Am J Clin Oncol            | 2007 | 4 | 1 | 2 | 341  | 4 |
| 77.  | 17611792 | Breast Cancer Res Treat    | 2007 | 4 | 1 | 2 | 210  | 4 |
| 78.  | 17968020 | J Clin Oncol               | 2007 | 4 | 1 | 2 | 752  | 4 |
| 79.  | 17971594 | J Clin Oncol               | 2007 | 1 | 7 | 2 | 865  | 4 |
| 80.  | 17971595 | J Clin Oncol               | 2007 | 1 | 2 | 2 | 352  | 4 |
| 81.  | 18037940 | Bone Marrow Transplant     | 2008 | 4 | 1 | 2 | 308  | 4 |
| 82.  | 18160686 | New Engl J Med             | 2007 | 4 | 5 | 2 | 722  | 4 |
| 83.  | 18483853 | Breast Cancer Res Treat    | 2009 | 4 | 1 | 3 | 416  | 2 |
| 84.  | 19020973 | Breast Cancer Res Treat    | 2009 | 1 | 9 | 2 | 157  | 5 |
| 85.  | 19254942 | Ann Oncol                  | 2009 | 4 | 1 | 3 | 441  | 2 |
| 86.  | 19273714 | J Clin Oncol               | 2009 | 4 | 1 | 2 | 305  | 4 |
| 87.  | 19289619 | J Clin Oncol               | 2009 | 2 | 4 | 2 | 156  | 5 |
| 88.  | 19687336 | J Clin Oncol               | 2009 | 4 | 1 | 2 | 751  | 5 |
| 89.  | 19690954 | Breast Cancer Res Treat    | 2010 | 2 | 4 | 2 | 112  | 5 |
| 90.  | 19768533 | Breast Cancer Res Treat    | 2010 | 4 | 1 | 2 | 100  | 4 |
| 91.  | 19786658 | J Clin Oncol               | 2009 | 2 | 4 | 2 | 1286 | 5 |
| 92.  | 19786670 | J Clin Oncol               | 2009 | 2 | 4 | 2 | 207  | 4 |
| 93.  | 19819914 | Ann Oncol                  | 2010 | 4 | 1 | 2 | 237  | 4 |
| 94.  | 19906761 | Ann Oncol                  | 2010 | 4 | 1 | 2 | 286  | 2 |
| 95.  | 20089562 | Ann Oncol                  | 2010 | 4 | 1 | 2 | 236  | 4 |
| 96.  | 20124187 | J Clin Oncol               | 2010 | 2 | 4 | 2 | 296  | 2 |
| 97.  | 20339913 | Breast Cancer Res Treat    | 2010 | 4 | 9 | 2 | 482  | 4 |
| 98.  | 20361253 | Breast Cancer Res Treat    | 2010 | 4 | 1 | 2 | 288  | 2 |
| 99.  | 20498403 | J Clin Oncol               | 2010 | 4 | 5 | 3 | 736  | 4 |
| 100. | 20530276 | J Clin Oncol               | 2010 | 4 | 1 | 2 | 1221 | 5 |
| 101. | 20855825 | J Clin Oncol               | 2010 | 1 | 2 | 2 | 736  | 4 |
| 102. | 20938664 | Cancer Chemother Pharmacol | 2011 | 1 | 2 | 2 | 234  | 5 |
| 103. | 21084429 | Ann Oncol                  | 2011 | 9 | 1 | 2 | 475  | 4 |
| 104. | 21115860 | J Clin Oncol               | 2011 | 2 | 4 | 2 | 263  | 4 |
| 105. | 21149659 | J Clin Oncol               | 2011 | 2 | 4 | 2 | 284  | 4 |
| 106. | 21251813 | Eur J Cancer               | 2011 | 9 | 1 | 2 | 162  | 5 |
| 107. | 21324184 | BMC Cancer                 | 2011 | 9 | 1 | 2 | 139  | 2 |

|      |          |                         |      |   |   |   |      |   |
|------|----------|-------------------------|------|---|---|---|------|---|
| 108. | 21358207 | Oncology                | 2010 | 4 | 1 | 2 | 102  | 2 |
| 109. | 21358208 | Oncology                | 2010 | 4 | 1 | 2 | 85   | 4 |
| 110. | 21376385 | Lancet Oncol            | 2011 | 4 | 1 | 2 | 762  | 2 |
| 111. | 21383283 | J Clin Oncol            | 2011 | 4 | 1 | 2 | 1237 | 4 |
| 112. | 21569994 | Clin Breast Cancer      | 2011 | 4 | 7 | 2 | 485  | 4 |
| 113. | 21572124 | Oncologist              | 2011 | 4 | 7 | 2 | 1028 | 5 |
| 114. | 21937705 | Ann Oncol               | 2012 | 4 | 1 | 2 | 148  | 2 |
| 115. | 21990397 | J Clin Oncol            | 2011 | 4 | 5 | 2 | 684  | 2 |
| 116. | 22025143 | J Clin Oncol            | 2011 | 4 | 1 | 3 | 323  | 1 |
| 117. | 22084374 | J Clin Oncol            | 2011 | 4 | 1 | 2 | 337  | 4 |
| 118. | 22094937 | Breast Cancer Res Treat | 2012 | 9 | 1 | 2 | 287  | 4 |
| 119. | 22149875 | New Engl J Med.         | 2012 | 2 | 4 | 2 | 808  | 4 |
| 120. | 22149876 | New Engl J Med          | 2012 | 1 | 7 | 2 | 724  | 4 |
| 121. | 22331954 | J Clin Oncol            | 2012 | 4 | 9 | 2 | 593  | 4 |
| 122. | 22370325 | J Clin Oncol            | 2012 | 1 | 2 | 2 | 514  | 5 |
| 123. | 22853014 | New Engl J Med          | 2012 | 1 | 2 | 2 | 694  | 4 |
| 124. | 23020162 | New Engl J Med.         | 2012 | 2 | 4 | 2 | 991  | 2 |
| 125. | 23233719 | J Clin Oncol            | 2013 | 1 | 7 | 2 | 1112 | 5 |
| 126. | 23312888 | Lancet Oncol            | 2013 | 4 | 5 | 2 | 564  | 5 |
| 127. | 23509322 | J Clin Oncol            | 2013 | 2 | 4 | 2 | 444  | 4 |
| 128. | 23537313 | BMC Cancer              | 2013 | 4 | 1 | 4 | 241  | 2 |
| 129. | 23569309 | J Clin Oncol            | 2013 | 4 | 1 | 2 | 231  | 4 |
| 130. | 23569311 | J Clin Oncol            | 2013 | 2 | 5 | 2 | 424  | 4 |
| 131. | 23715630 | Breast Cancer Res Treat | 2013 | 1 | 2 | 2 | 298  | 4 |
| 132. | 23771714 | Breast Cancer Res Treat | 2013 | 4 | 1 | 2 | 340  | 2 |
| 133. | 23857972 | J Clin Oncol            | 2013 | 4 | 9 | 2 | 442  | 4 |
| 134. | 23902874 | Lancet Oncol            | 2013 | 1 | 2 | 2 | 723  | 5 |
| 135. | 24401928 | Ann Oncol               | 2014 | 2 | 1 | 2 | 363  | 2 |
| 136. | 24504445 | Ann Oncol               | 2014 | 4 | 1 | 2 | 78   | 5 |
| 137. | 24742739 | Lancet Oncol            | 2014 | 2 | 7 | 2 | 569  | 2 |
| 138. | 24793816 | Lancet Oncol            | 2014 | 2 | 4 | 2 | 602  | 2 |
| 139. | 24888818 | J Clin Oncol            | 2014 | 4 | 1 | 2 | 123  | 2 |
| 140. | 25176223 | Int J Oncol             | 2014 | 4 | 1 | 2 | 233  | 2 |
| 141. | 25185099 | J Clin Oncol            | 2015 | 4 | 9 | 2 | 1144 | 4 |
| 142. | 25273342 | Lancet Oncol            | 2014 | 4 | 5 | 2 | 494  | 2 |
| 143. | 25273343 | Lancet Oncol            | 2014 | 4 | 5 | 2 | 360  | 4 |
| 144. | 25348000 | J Clin Oncol            | 2014 | 1 | 4 | 2 | 324  | 5 |
| 145. | 25349301 | J Clin Oncol            | 2014 | 3 | 6 | 2 | 519  | 2 |
| 146. | 25519041 | Breast Cancer Res Treat | 2015 | 4 | 5 | 2 | 227  | 2 |
| 147. | 25605838 | J Clin Oncol            | 2015 | 2 | 4 | 2 | 540  | 4 |
| 148. | 25605862 | J Clin Oncol            | 2015 | 4 | 1 | 2 | 1102 | 5 |
| 149. | 25691671 | J Clin Oncol            | 2015 | 1 | 5 | 2 | 374  | 4 |
| 150. | 25779558 | J Clin Oncol            | 2015 | 2 | 4 | 2 | 652  | 4 |
| 151. | 25795409 | Lancet Oncol            | 2015 | 3 | 1 | 2 | 240  | 3 |
| 152. | 26030518 | New Engl J Med.         | 2015 | 1 | 2 | 2 | 521  | 2 |
| 153. | 26056183 | J Clin Oncol            | 2015 | 4 | 1 | 3 | 900  | 2 |
| 154. | 26092818 | Lancet Oncol            | 2015 | 2 | 4 | 2 | 719  | 5 |
| 155. | 26350351 | Breast Cancer           | 2016 | 1 | 2 | 2 | 222  | 5 |
| 156. | 26482278 | Lancet Oncol            | 2015 | 4 | 1 | 2 | 840  | 2 |
| 157. | 26617202 | Lancet Oncol            | 2016 | 4 | 1 | 2 | 618  | 2 |
| 158. | 26822398 | Lancet Oncol            | 2016 | 2 | 4 | 2 | 508  | 2 |
| 159. | 26916095 | Ann Oncol               | 2016 | 1 | 5 | 2 | 117  | 2 |
| 160. | 26927446 | Breast Cancer Res Treat | 2016 | 4 | 5 | 2 | 600  | 4 |
| 161. | 26941199 | Breast Cancer Res Treat | 2016 | 9 | 1 | 3 | 180  | 2 |
| 162. | 27078022 | JAMA Oncology           | 2016 | 2 | 4 | 2 | 479  | 2 |
| 163. | 27138575 | J Clin Oncol            | 2016 | 4 | 5 | 2 | 350  | 5 |

|      |          |                         |      |   |   |   |      |   |
|------|----------|-------------------------|------|---|---|---|------|---|
| 164. | 27359058 | Oncotarget              | 2016 | 1 | 2 | 2 | 221  | 5 |
| 165. | 27618821 | Cancer Res Treat        | 2017 | 4 | 1 | 2 | 212  | 4 |
| 166. | 27717303 | New Engl J Med          | 2016 | 1 | 2 | 2 | 668  | 4 |
| 167. | 27724870 | BMC Cancer              | 2016 | 4 | 5 | 2 | 147  | 4 |
| 168. | 27798749 | Breast Cancer Res Treat | 2017 | 4 | 1 | 2 | 210  | 2 |
| 169. | 27803006 | Ann Oncol               | 2017 | 4 | 9 | 2 | 416  | 5 |
| 170. | 27817944 | Eur J Cancer            | 2016 | 4 | 5 | 2 | 481  | 2 |
| 171. | 27908454 | Lancet                  | 2016 | 1 | 2 | 2 | 462  | 2 |
| 172. | 27918780 | JAMA                    | 2017 | 2 | 4 | 2 | 458  | 2 |
| 173. | 27959613 | New Engl J Med          | 2016 | 1 | 2 | 2 | 666  | 5 |
| 174. | 27998961 | Ann Oncol               | 2017 | 2 | 4 | 2 | 175  | 4 |
| 175. | 28005247 | Breast Cancer Res Treat | 2017 | 4 | 1 | 2 | 162  | 5 |
| 176. | 28056202 | J Clin Oncol            | 2017 | 2 | 4 | 3 | 1095 | 5 |
| 177. | 28209298 | Lancet Oncol            | 2017 | 4 | 1 | 2 | 405  | 2 |
| 178. | 28437161 | J Clin Oncol            | 2017 | 2 | 4 | 2 | 452  | 2 |
| 179. | 28576675 | Lancet Oncol            | 2017 | 1 | 9 | 2 | 1147 | 2 |
| 180. | 28578601 | New Engl J Med          | 2017 | 4 | 6 | 2 | 302  | 5 |
| 181. | 28580882 | J Clin Oncol            | 2017 | 1 | 2 | 2 | 669  | 4 |
| 182. | 28968163 | J Clin Oncol            | 2017 | 1 | 2 | 2 | 493  | 4 |
| 183. | 28830796 | Clin Breat Cancer       | 2017 | 4 | 9 | 2 | 537  | 2 |
| 184. | 29447329 | Ann Oncol               | 2018 | 4 | 1 | 2 | 770  | 4 |
| 185. | 29481630 | Ann Oncol               | 2018 | 4 | 1 | 2 | 594  | 2 |
| 186. | 29713086 | Nat Med                 | 2018 | 3 | 1 | 2 | 376  | 2 |
| 187. | 29804902 | Lancet Oncol            | 2018 | 1 | 8 | 2 | 672  | 4 |
| 188. | 29860922 | J Clin Oncol            | 2018 | 1 | 8 | 2 | 726  | 3 |
| 189. | 29878040 | Ann Oncol               | 2018 | 3 | 1 | 3 | 191  | 5 |
| 190. | 30110579 | N Engl J Med            | 2018 | 4 | 6 | 2 | 431  | 2 |
| 191. | 30121808 | Breast Cancer Res Treat | 2018 | 4 | 1 | 2 | 420  | 2 |
| 192. | 30345906 | N Engl J Med            | 2018 | 3 | 9 | 2 | 902  | 2 |
| 193. | 30568294 | Br J Cancer             | 2018 | 2 | 4 | 2 | 707  | 2 |
| 194. | 29223745 | Lancet Oncol            | 2018 | 1 | 9 | 2 | 432  | 3 |
| 195. | 30745582 | Br J Cancer             | 2019 | 4 | 1 | 2 | 436  | 5 |
| 196. | 30928806 | Eur J Cancer            | 2019 | 4 | 1 | 2 | 530  | 5 |
| 197. | 31028610 | Breast Cancer Res Treat | 2019 | 4 | 1 | 2 | 235  | 3 |
| 198. | 31036468 | Lancet Oncol            | 2019 | 1 | 9 | 2 | 365  | 2 |
| 199. | 31091374 | N Engl J Med.           | 2019 | 1 | 9 | 2 | 572  | 2 |
| 200. | 31825569 | N Engl J Med            | 2019 | 2 | 4 | 2 | 612  | 2 |
| 201. | 29458237 | Cancer Res Treat        | 2019 | 4 | 1 | 2 | 221  | 2 |
| 202. | 31841354 | J Clin Oncol            | 2019 | 3 | 9 | 2 | 140  | 2 |
| 203. | 32564260 | Breast Cancer Res Treat | 2020 | 2 | 8 | 2 | 243  | 5 |
| 204. | 32578279 | Eur J Cancer Care       | 2020 | 2 | 4 | 2 | 166  | 2 |
| 205. | 32678716 | J Clin Oncol            | 2020 | 2 | 4 | 2 | 621  | 2 |
| 206. | 32819305 | BMC Cancer              | 2020 | 2 | 4 | 2 | 225  | 2 |
| 207. | 32822287 | J Clin Oncol            | 2020 | 2 | 4 | 3 | 355  | 5 |
| 208. | 32861273 | Lancet Oncol            | 2020 | 4 | 6 | 2 | 513  | 2 |
| 209. | 33186740 | Ann Oncol               | 2020 | 1 | 9 | 2 | 516  | 5 |
| 210. | 33278935 | Lancet                  | 2020 | 3 | 9 | 2 | 847  | 2 |

Phenotype: 1, hormone-receptor-positive alone; 2, HER-2-positive alone; 3, triple-negative alone; 4, mixed; 9, unknown; Therapy: 1, chemotherapy; 2, endocrine therapy; 3, chemotherapy + endocrine therapy; 4, anti-HER therapy; 5, bevacizumab; 6, PARP inhibitors; 7, mTOR inhibitors; 8, CDK 4/6 inhibitors; 9, others; BM allowance: 1, allowed, no restrictions; 2, allowed, with restrictions; 3, allowed, restrictions not specified; 4, not allowed; 5, allowance not reported.
